# Supplementary material
Source: PubMed Central journal article supplement (PMC4892226)
Supplement: Supp_Fig1.pdf [file Supp_Fig1.pdf]

## Supplementary Data

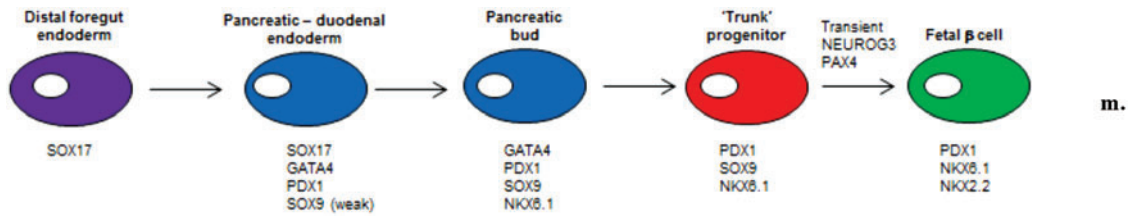

**SUPPLEMENTARY FIG. S1.** Temporal expression of endocrine and pancreatic  $\beta$ -cell progenitor markers during fetal  $\beta$ -cell differentiation.
