# Supplementary material
Source: PubMed Central journal article supplement (PMC4892226)
Supplement: Supp_Fig2.pdf [file Supp_Fig2.pdf]

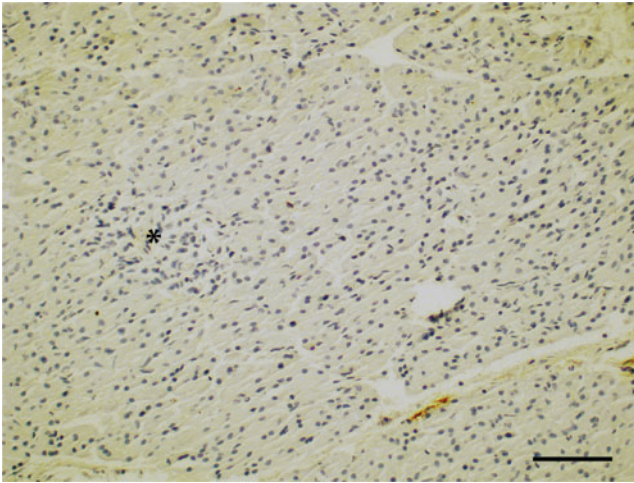

**SUPPLEMENTARY FIG. S2.** CD90 immunohistochemistry of normal pancreatic tissue demonstrating negative staining in the pancreatic islet marked with an *asterisk*. Bar = 200  $\mu$ m.
