# Supplementary material
Source: PubMed Central journal article supplement (PMC4892226)
Supplement: Supp_Table1.pdf [file Supp_Table1.pdf]

SUPPLEMENTARY TABLE S1. NUCLEOTIDE SEQUENCES OF PRIMERS USED FOR QUANTITATIVE  
REAL-TIME POLYMERASE CHAIN REACTION

| <i>Symbol</i>  | <i>Gene accession number</i>                                                          | <i>Primer sequences (5'-3')</i>                         | <i>Ta (°C)</i> |
|----------------|---------------------------------------------------------------------------------------|---------------------------------------------------------|----------------|
| <i>CD90</i>    | Thy-1 cell surface antigen<br><i>NM_006288.3</i>                                      | F: CGCTCTCCTGCTAACAGTCTTG C<br>R: CCCCCACAGTGCCAAAGAGC  | 64.4           |
| <i>GATA4</i>   | Gata binding protein 4<br><i>NM_002052.3</i>                                          | F: TGTCCCAGACGTTCTCAG<br>R: GGCTGTTCCAAGAGTCCT          | 62.5           |
| <i>NEUROG3</i> | Neurogenin 3<br><i>NM_020999.3</i>                                                    | F: CGGTAGAAAGGATGACGC<br>R: GTCACTTCGTCTTCCGAG          | 62.2           |
| <i>NKX2.2</i>  | NK2 homeobox 2<br><i>NM_002509.3</i>                                                  | F: TTCAGTACTCCCTGCACG<br>R: ATTGTCCGGTGACTCGTC          | 59.5           |
| <i>NKX6.1</i>  | NK6 homeobox 1<br><i>NM_006168.2</i>                                                  | F: CCCTGGAGAAGACTTTCG<br>R: GAACCAGACCTTGACCTG          | 59.5           |
| <i>PAX4</i>    | Paired box 4<br><i>NM_006193.2</i>                                                    | F: GGCCTGGAGAAAGAGTTCC<br>R: CTTGAGCTTCTCTTGCCGAC       | 65.0           |
| <i>PDX1</i>    | Pancreatic and duodenal homeobox 1<br><i>NM_000209.3</i>                              | F: CAGCACTCCACCTTGGGACC<br>R: CCCCCTGTGTGTGTTAGGG       | 66.7           |
| <i>SNAI1</i>   | <i>Homo sapiens</i> snail family zinc finger 1<br><i>NM_005985.2</i>                  | F: CATCCTTCTCACTGCCATG<br>R: TCTTCATCAAAGTCTGTGG        | 60.0           |
| <i>SOX9</i>    | SR $\bar{Y}$ (sex determining region Y)-box 9<br><i>NM_000346.3</i>                   | F: TCTGGAGACTTCTGAACGAGAGCG<br>R: TTCACCGACTTCTCCGCCG   | 57.0           |
| <i>SOX17</i>   | SR $\bar{Y}$ (sex determining region Y)-box 17<br><i>NM_022454.3</i>                  | F: TCTGCCTCCTCCACGAAG<br>R: CAGATTCCAGACCTGCACAA        | 60.0           |
| <i>TWIST1</i>  | <i>Homo sapiens</i> twist family bHLH<br>transcription factor 1<br><i>NM_000474.3</i> | F: TGCATGCATTCTCAAGAGGT<br>R: CTATGGTTTTGCAGGCCAGT      | 60.0           |
| <i>GAPDH</i>   | Glyceraldehyde-3-phosphate dehydrogenase<br><i>NM_002046.5</i>                        | F: CAAGATCATCAGCAATGCCT<br>R: AGGGATGATGTTCTGGAGAG      | 60.0           |
| <i>HPRT</i>    | Hypoxanthine phosphoribosyltransferase 1<br><i>NM_000194.2</i>                        | F: ATAAGCCAGACTTTGTTGGA<br>R: CTCAACTTGA ACTCTCATCTTAGG | 60.0           |
| <i>RPL19</i>   | Ribosomal protein L19<br><i>NM_000981.3</i>                                           | F: ATGAGTATGCTCAGGCTTCAG<br>R: GATCAGCCCATCTTTGATGAG    | 64.0           |

F, forward primer; R, reverse primer; Ta, annealing temperature.
