# Supplementary material
Source: PubMed Central journal article supplement (PMC4892226)
Supplement: Supp_Table2.pdf [file Supp_Table2.pdf]

SUPPLEMENTARY TABLE S2. OVERVIEW OF THE LYOPLATE SCREENING RESULTS, DISPLAYING THE PERCENTAGE OF POSITIVE CELLS PER MARKER AND THE MEAN FLUORESCENT INTENSITY OF THE WHOLE CELL POPULATION AND OF THE POSITIVE CELL POPULATION

| <i>Cell surface marker</i> | <i>% positive cells</i> | <i>MFI</i> | <i>MFI positive cell population</i> |
|----------------------------|-------------------------|------------|-------------------------------------|
| CD1a                       | 0.02                    | 60.56      | 387.81                              |
| CD1b                       | 0.03                    | 62.54      | 2,081.35                            |
| CD1d                       | 0.02                    | 61.46      | 629.95                              |
| CD2                        | 0.02                    | 65.79      | 414.31                              |
| CD3                        | 0.04                    | 81.36      | 34,531.61                           |
| CD4                        | 0                       | 69.9       | 131,443.89                          |
| CD4v4                      | 0.53                    | 79.58      | 3,117.92                            |
| CD5                        | 0.02                    | 68.34      | 24,245.49                           |
| CD6                        | 0.03                    | 62.56      | 452.57                              |
| CD7                        | 0.02                    | 63.68      | 418.35                              |
| CD8a                       | 0.02                    | 67.67      | 26,642.76                           |
| CD8b                       | 0.06                    | 62.16      | 685.3                               |
| CD9                        | 73.46                   | 2230.13    | 2,969.22                            |
| CD10                       | 40.79                   | 443.25     | 873.55                              |
| CD11a                      | 0.03                    | 61.39      | 457.62                              |
| CD11b                      | 0.07                    | 66.39      | 470.74                              |
| CD11c                      | 0.02                    | 61.15      | 815.02                              |
| CD13                       | 0.03                    | 66.66      | 2,135.37                            |
| CD14                       | 0.02                    | 65.21      | 17,853.5                            |
| CD15                       | 0.03                    | 62.16      | 571.04                              |
| CD15s                      | 0.12                    | 62.54      | 619.91                              |
| CD16                       | 0.01                    | 61.92      | 470.66                              |
| CD18                       | 0.01                    | 61.62      | 353.93                              |
| CD19                       | 0.02                    | 60.35      | 533.68                              |
| CD20                       | 0.12                    | 68.27      | 5,257.89                            |
| CD21                       | 0.05                    | 68.99      | 5,105.64                            |
| CD22                       | 0.26                    | 73.58      | 403.06                              |
| CD23                       | 0.02                    | 62.8       | 374.28                              |
| CD24                       | 0.05                    | 61.21      | 369.33                              |
| CD25                       | 0.04                    | 65.03      | 511.55                              |
| CD26                       | 0.97                    | 86.05      | 1,164.57                            |
| CD27                       | 0.13                    | 64.08      | 422.32                              |
| CD28                       | 0.06                    | 68.72      | 10,331.49                           |
| CD29                       | 28.53                   | 265.01     | 459.92                              |
| CD30                       | 0.13                    | 68.3       | 425.57                              |
| CD31                       | 0.06                    | 61.6       | 495.87                              |
| CD32                       | 0.03                    | 64.97      | 3,665.9                             |
| CD33                       | 5.84                    | 101.08     | 499.44                              |
| CD34                       | 0.89                    | 76.18      | 1,466.18                            |
| CD35                       | 0.03                    | 74.98      | 37,838.51                           |
| CD36                       | 0.37                    | 73.08      | 2,382.07                            |
| CD37                       | 0.02                    | 63.44      | 657.6                               |
| CD38                       | 0.04                    | 69.14      | 14,953.86                           |
| CD39                       | 3.05                    | 88.72      | 499.34                              |
| CD40                       | 75.04                   | 535.41     | 640.39                              |
| CD41a                      | 0.06                    | 64.47      | 466.15                              |
| CD41b                      | 0.02                    | 77.06      | 58,622.46                           |
| CD42a                      | 0.22                    | 63.98      | 542.88                              |
| CD42b                      | 0.02                    | 61.71      | 594.54                              |
| CD43                       | 1.52                    | 81.82      | 596.52                              |
| CD44                       | 87.34                   | 3602.71    | 4,095.4                             |
| CD45                       | 0.03                    | 62.15      | 1,559.62                            |
| CD45RA                     | 0.1                     | 68.42      | 5,898.37                            |
| CD45RB                     | 0.02                    | 62.92      | 420.74                              |
| CD45RO                     | 0.34                    | 64.83      | 804.93                              |
| CD46                       | 98.65                   | 1372.06    | 1,387.6                             |
| CD47                       | 98.69                   | 2631.5     | 2,663.26                            |

(continued)

SUPPLEMENTARY TABLE S2. (CONTINUED)

| <i>Cell surface marker</i> | <i>% positive cells</i> | <i>MFI</i> | <i>MFI positive cell population</i> |
|----------------------------|-------------------------|------------|-------------------------------------|
| CD48                       | 0.06                    | 63.25      | 771.91                              |
| CD49a                      | 0.1                     | 62.84      | 535.9                               |
| CD49b                      | 39.14                   | 319.92     | 536.6                               |
| CD49c                      | 27.48                   | 333.18     | 851.96                              |
| CD49d                      | 0.08                    | 72.86      | 8,027.75                            |
| CD49e                      | 93.5                    | 2499.21    | 2,658.86                            |
| CD50                       | 0.25                    | 66.69      | 570.85                              |
| CD51/61                    | 77.52                   | 744.6      | 902.04                              |
| CD53                       | 0.02                    | 63.08      | 388.29                              |
| CD54                       | 89.5                    | 2415.9     | 2,674.33                            |
| CD55                       | 84.04                   | 704.57     | 795.89                              |
| CD56                       | 1.34                    | 90.4       | 1,861.15                            |
| CD57                       | 0.89                    | 83.49      | 1,519.14                            |
| CD58                       | 74.03                   | 1451.61    | 1,897.03                            |
| CD59                       | 86.15                   | 1615.93    | 1,842.75                            |
| CD61                       | 63.23                   | 620.77     | 872.41                              |
| CD62E                      | 0.02                    | 74.72      | 680.8                               |
| CD62L                      | 0.03                    | 78.19      | 18,463.43                           |
| CD62P                      | 0.04                    | 82.82      | 483.45                              |
| CD63                       | 97.91                   | 2710.13    | 2,763.08                            |
| CD64                       | 0.03                    | 68.73      | 1,610.18                            |
| CD66(a.c.d.e)              | 65.35                   | 691.66     | 964.19                              |
| CD66b                      | 0.31                    | 76.08      | 470.4                               |
| CD66f                      | 0.03                    | 70.91      | 11,148.23                           |
| CD69                       | 0.03                    | 66.96      | 391.13                              |
| CD70                       | 0.12                    | 80.49      | 406.93                              |
| CD71                       | 11.43                   | 188.22     | 813.2                               |
| CD72                       | 0.04                    | 81.57      | 41,405.29                           |
| CD73                       | 26.95                   | 325.54     | 861.21                              |
| CD74                       | 20.57                   | 293.99     | 996.78                              |
| CD75                       | 0.23                    | 66.99      | 507.59                              |
| CD77                       | 0.62                    | 80.16      | 2,077.25                            |
| CD79b                      | 0.85                    | 88.02      | 2,214.36                            |
| CD80                       | 0.13                    | 87.23      | 5,620.58                            |
| CD81                       | 95.1                    | 4925.73    | 5,168.98                            |
| CD83                       | 0.84                    | 93.7       | 1,300.49                            |
| CD84                       | 0.07                    | 84.55      | 13,976.1                            |
| CD85                       | 0.02                    | 74.36      | 564.79                              |
| CD86                       | 0.04                    | 61.11      | 4,065.21                            |
| CD87                       | 0.09                    | 62.72      | 424.7                               |
| CD88                       | 0.01                    | 60.41      | 4,047.17                            |
| CD89                       | 0.03                    | 73.93      | 33,117.28                           |
| CD90                       | 16.11                   | 642.45     | 3,576.25                            |
| CD91                       | 2.71                    | 105.28     | 1,162.07                            |
| CDw93                      | 0.02                    | 61.48      | 465.78                              |
| CD94                       | 0.03                    | 61.87      | 473.28                              |
| CD95                       | 62.62                   | 441.99     | 582.25                              |
| CD97                       | 37.24                   | 364.41     | 756.96                              |
| CD98                       | 81.51                   | 5387.32    | 6,569.61                            |
| CD99                       | 16.96                   | 200.7      | 567.65                              |
| CD99R                      | 0.06                    | 66.21      | 1,608.2                             |
| CD100                      | 0.02                    | 65.35      | 6,706.84                            |
| CD102                      | 0.02                    | 60.88      | 467.03                              |
| CD103                      | 0.02                    | 62.97      | 353.18                              |
| CD105                      | 75.88                   | 900.39     | 1,130.07                            |
| CD106                      | 4.26                    | 95.35      | 550.07                              |
| CD107a                     | 6.89                    | 145.53     | 664.65                              |
| CD107b                     | 8.7                     | 165.24     | 609.97                              |
| CD108                      | 24.61                   | 237.92     | 453.02                              |
| CD109                      | 21.27                   | 234.36     | 495.17                              |
| CD112                      | 0.26                    | 73.69      | 2,619.26                            |

(continued)

SUPPLEMENTARY TABLE S2. (CONTINUED)

| <i>Cell surface marker</i> | <i>% positive cells</i> | <i>MFI</i> | <i>MFI positive cell population</i> |
|----------------------------|-------------------------|------------|-------------------------------------|
| CD114                      | 0.02                    | 67.88      | 33,105.53                           |
| CD116                      | 0.05                    | 61.37      | 368.54                              |
| CD117                      | 0.04                    | 62.88      | 389.28                              |
| CD118                      | 0.02                    | 62.72      | 443.02                              |
| (LIF rcptr)                |                         |            |                                     |
| CD119                      | 25.14                   | 247.77     | 426.36                              |
| CD120a                     | 3.65                    | 136.48     | 1,203.98                            |
| CD121a                     | 0.1                     | 71.02      | 8,177.59                            |
| CD121b                     | 0.03                    | 67.8       | 20,573.96                           |
| CD122                      | 0.06                    | 64.12      | 1,640.4                             |
| CD123                      | 0.03                    | 68.17      | 19,162.28                           |
| CD124                      | 0.03                    | 70.12      | 19,080.37                           |
| CD126                      | 0.04                    | 86.86      | 388.92                              |
| CD127                      | 0.04                    | 65.24      | 13,691.26                           |
| CD128b                     | 0.03                    | 64.49      | 17,883.29                           |
| CD130                      | 14.93                   | 171.37     | 428.54                              |
| CD134                      | 1.02                    | 84.36      | 413.25                              |
| CD135                      | 0.03                    | 59.93      | 387.81                              |
| CD137                      | 0.04                    | 66.68      | 16,109.07                           |
| CD137L                     | 0.3                     | 68.11      | 887.57                              |
| CD138                      | 2.83                    | 142.23     | 1,140.15                            |
| CD140a                     | 0.03                    | 62.17      | 923.11                              |
| CD140b                     | 0.02                    | 65.86      | 37,795.35                           |
| CD141                      | 0.12                    | 64.58      | 2,830.26                            |
| CD142                      | 2.25                    | 129.71     | 382.65                              |
| CD144                      | 1.26                    | 76.56      | 741.59                              |
| CD146                      | 71.75                   | 2769.72    | 3,791.24                            |
| CD147                      | 83.79                   | 3499.94    | 4,144.06                            |
| CD150                      | 0.03                    | 62.2       | 758.58                              |
| CD151                      | 96.53                   | 1617.14    | 1,667.4                             |
| CD152                      | 0.11                    | 71.48      | 838.37                              |
| CD153                      | 0.49                    | 69.89      | 645.45                              |
| CD154                      | 0.06                    | 68.29      | 8,158.57                            |
| CD158a                     | 0.03                    | 67.72      | 16,741.4                            |
| CD158b                     | 0.04                    | 61.66      | 396.27                              |
| CD161                      | 0.03                    | 67.88      | 21,644.87                           |
| CD162                      | 0.09                    | 63.51      | 416.73                              |
| CD163                      | 0.03                    | 62.97      | 403.94                              |
| CD164                      | 18.06                   | 312.38     | 1,257.65                            |
| CD165                      | 8.02                    | 131.6      | 702.36                              |
| CD166                      | 15.05                   | 209.56     | 857.3                               |
| CD171                      | 70                      | 1805.63    | 2,510.59                            |
| CD172b                     | 0.05                    | 67.42      | 936.53                              |
| CD177                      | 0.07                    | 67.68      | 1,295.48                            |
| CD178                      | 0.03                    | 75.27      | 37,765.87                           |
| CD180                      | 0.09                    | 64.06      | 419.44                              |
| CD181                      | 0.2                     | 65.95      | 420.97                              |
| CD183                      | 1.52                    | 86.04      | 1,614.03                            |
| CD184                      | 0.04                    | 61.76      | 453.22                              |
| CD193                      | 0.03                    | 61.19      | 821.17                              |
| CD195                      | 0.03                    | 67.1       | 23,155.69                           |
| CD196                      | 0.63                    | 65.51      | 658.49                              |
| CD197                      | 0.05                    | 61.8       | 548.33                              |
| CD200                      | 1.36                    | 110.61     | 1,192.21                            |
| CD205                      | 72.34                   | 530.78     | 652.22                              |
| CD206                      | 0.05                    | 61.73      | 438.46                              |
| CD209                      | 0.82                    | 71.27      | 955.38                              |
| CD220                      | 62.22                   | 399.89     | 509.24                              |
| CD221                      | 88.92                   | 789.3      | 860.07                              |
| CD226                      | 0.04                    | 68.21      | 15,837.52                           |
| CD227                      | 32.05                   | 292.03     | 610.18                              |

(continued)

SUPPLEMENTARY TABLE S2. (CONTINUED)

| <i>Cell surface marker</i> | <i>% positive cells</i> | <i>MFI</i> | <i>MFI positive cell population</i> |
|----------------------------|-------------------------|------------|-------------------------------------|
| CD229                      | 0.02                    | 63.7       | 415.66                              |
| CD231                      | 0.13                    | 70.31      | 5,112.3                             |
| CD235a                     | 10.78                   | 164.78     | 433.72                              |
| CD243                      | 0.03                    | 67.76      | 22,242.95                           |
| (P-glycoprotein)           |                         |            |                                     |
| CD244                      | 0.02                    | 71.19      | 44,431.02                           |
| CD255 (TWEAK)              | 0.03                    | 69.04      | 20,484.93                           |
| CD268                      | 0.09                    | 79.07      | 6,907.84                            |
| CD271                      | 16.14                   | 373.04     | 1,824.51                            |
| CD273                      | 0.19                    | 69.17      | 502.53                              |
| CD274                      | 0.34                    | 83.01      | 414.18                              |
| CD275 (B7-H2)              | 4.61                    | 129.49     | 639.54                              |
| CD278                      | 0.03                    | 70.46      | 20,534.39                           |
| CD279                      | 0.48                    | 74.83      | 1,979.02                            |
| CD282                      | 0.01                    | 63.02      | 455.02                              |
| CD305(LAIR-1)              | 0.02                    | 65.85      | 29,238.44                           |
| CD309                      | 0.3                     | 78.83      | 2,241.42                            |
| CD314(NKG2D)               | 0.04                    | 60.02      | 390.89                              |
| CD321(F11 Rcptr)           | 84.8                    | 1097.2     | 1,258.5                             |
| CDw327                     | 0.04                    | 61.35      | 593.56                              |
| CDw328                     | 0.09                    | 61.52      | 445.78                              |
| CDw329                     | 0.16                    | 68.25      | 449.34                              |
| CD335(NKP46)               | 0.03                    | 65.63      | 20,762.86                           |
| CD336                      | 0.02                    | 59.61      | 507.87                              |
| CD337                      | 1.25                    | 78.35      | 1,171.98                            |
| CD338(ABCG2)               | 0.34                    | 75.16      | 394.95                              |
| CD340(Her2)                | 46.07                   | 400.2      | 692.92                              |
| abTCR                      | 0.14                    | 60.52      | 456.06                              |
| B2-uGlob                   | 30.15                   | 358.33     | 879.26                              |
| BLTR-1                     | 0.04                    | 70.29      | 27,092.8                            |
| CLIP                       | 3.55                    | 109.81     | 672.71                              |
| CMRF-44                    | 0.05                    | 61.1       | 404.35                              |
| CMRF-56                    | 0.16                    | 91.32      | 7,731.1                             |
| EGF-r                      | 0.02                    | 67.1       | 33,425.33                           |
| Fmlp-r                     | 0.02                    | 60.5       | 421.63                              |
| gd TCR                     | 0.02                    | 68.6       | 29,461.89                           |
| Hem. Prog. Cell            | 0.09                    | 66.94      | 6,545.19                            |
| HLA-A.B.C                  | 98.58                   | 3978.25    | 4,032.48                            |
| HLA-A2                     | 0.03                    | 60.75      | 1,257.78                            |
| HLA-DQ                     | 25.92                   | 636.88     | 2,173.86                            |
| HLA-DR                     | 89.25                   | 4630.82    | 5,167.32                            |
| HLA-DR.DP.DO               | 87.37                   | 3112.12    | 3,537.06                            |
| Invariant NKT              | 0.61                    | 91.39      | 1,880.02                            |
| Disialoganglioside GD2     | 12.51                   | 557.77     | 3,926.15                            |
| MIC A/B                    | 0.06                    | 69.57      | 4,930.32                            |
| NKB1                       | 0.03                    | 73.69      | 33,824.28                           |
| SSEA-1                     | 0.03                    | 70.23      | 28,814.69                           |
| SSEA-4                     | 0.27                    | 71.14      | 894.56                              |
| TRA-1-60                   | 0.03                    | 72.02      | 35,373.02                           |
| TRA-1-81                   | 0.02                    | 64.48      | 26,600.88                           |
| Vb 23                      | 0.2                     | 72.33      | 5,820.11                            |
| Vb 8                       | 1                       | 108.21     | 2,462.66                            |
| mIgM                       | 0.39                    | 90.07      | 6,259.31                            |
| mIgG1                      | 0.66                    | 83.38      | 3,350.87                            |
| mIgG2a                     | 0.81                    | 85.7       | 1,892.45                            |
| mIgG2b                     | 0.07                    | 72.16      | 14,794.07                           |
| mIgG3                      | 0.08                    | 82.63      | 25,501.51                           |
| CD49f                      | 55.84                   | 618.04     | 960.69                              |
| CD104                      | 0.06                    | 72.86      | 11,522.79                           |
| CD120b                     | 0.08                    | 89.39      | 33,385.24                           |

(continued)

SUPPLEMENTARY TABLE S2. (CONTINUED)

| <i>Cell surface marker</i> | <i>% positive cells</i> | <i>MFI</i> | <i>MFI positive cell population</i> |
|----------------------------|-------------------------|------------|-------------------------------------|
| CD132                      | 0.05                    | 71.83      | 1,6879.5                            |
| CD201                      | 83.83                   | 1344.55    | 1,569.75                            |
| CD210                      | 0.07                    | 66.21      | 6950.9                              |
| CD212                      | 0.06                    | 97.16      | 13,413.62                           |
| CD267                      | 0.04                    | 74.53      | 32,439.15                           |
| CD294                      | 0.04                    | 81.41      | 54,317.38                           |
| CD326                      | 1.57                    | 121.09     | 867.2                               |
| Cutaneous Lymph. Antigen   | 0.66                    | 77.11      | 2,278.89                            |
| INT B7                     | 0.04                    | 69.77      | 21,037.09                           |
| SSEA-3                     | 0.02                    | 87.41      | 78,584.07                           |
| rIgM                       | 0.02                    | 67.12      | 1,500.71                            |
| rIgG1                      | 0.01                    | 65.24      | 466.94                              |
| rIgG2a                     | 0.01                    | 64.17      | 447.62                              |
| rIgG2b                     | 0                       | 62.95      | 1,915.57                            |

MFI, mean fluorescent intensity.
